# Supplementary material
Source: publisher site journal article supplement (https://www.dovepress.com/article/501823)
Supplement: Supplementary file 1 [file get_supplementary_file.php]

**
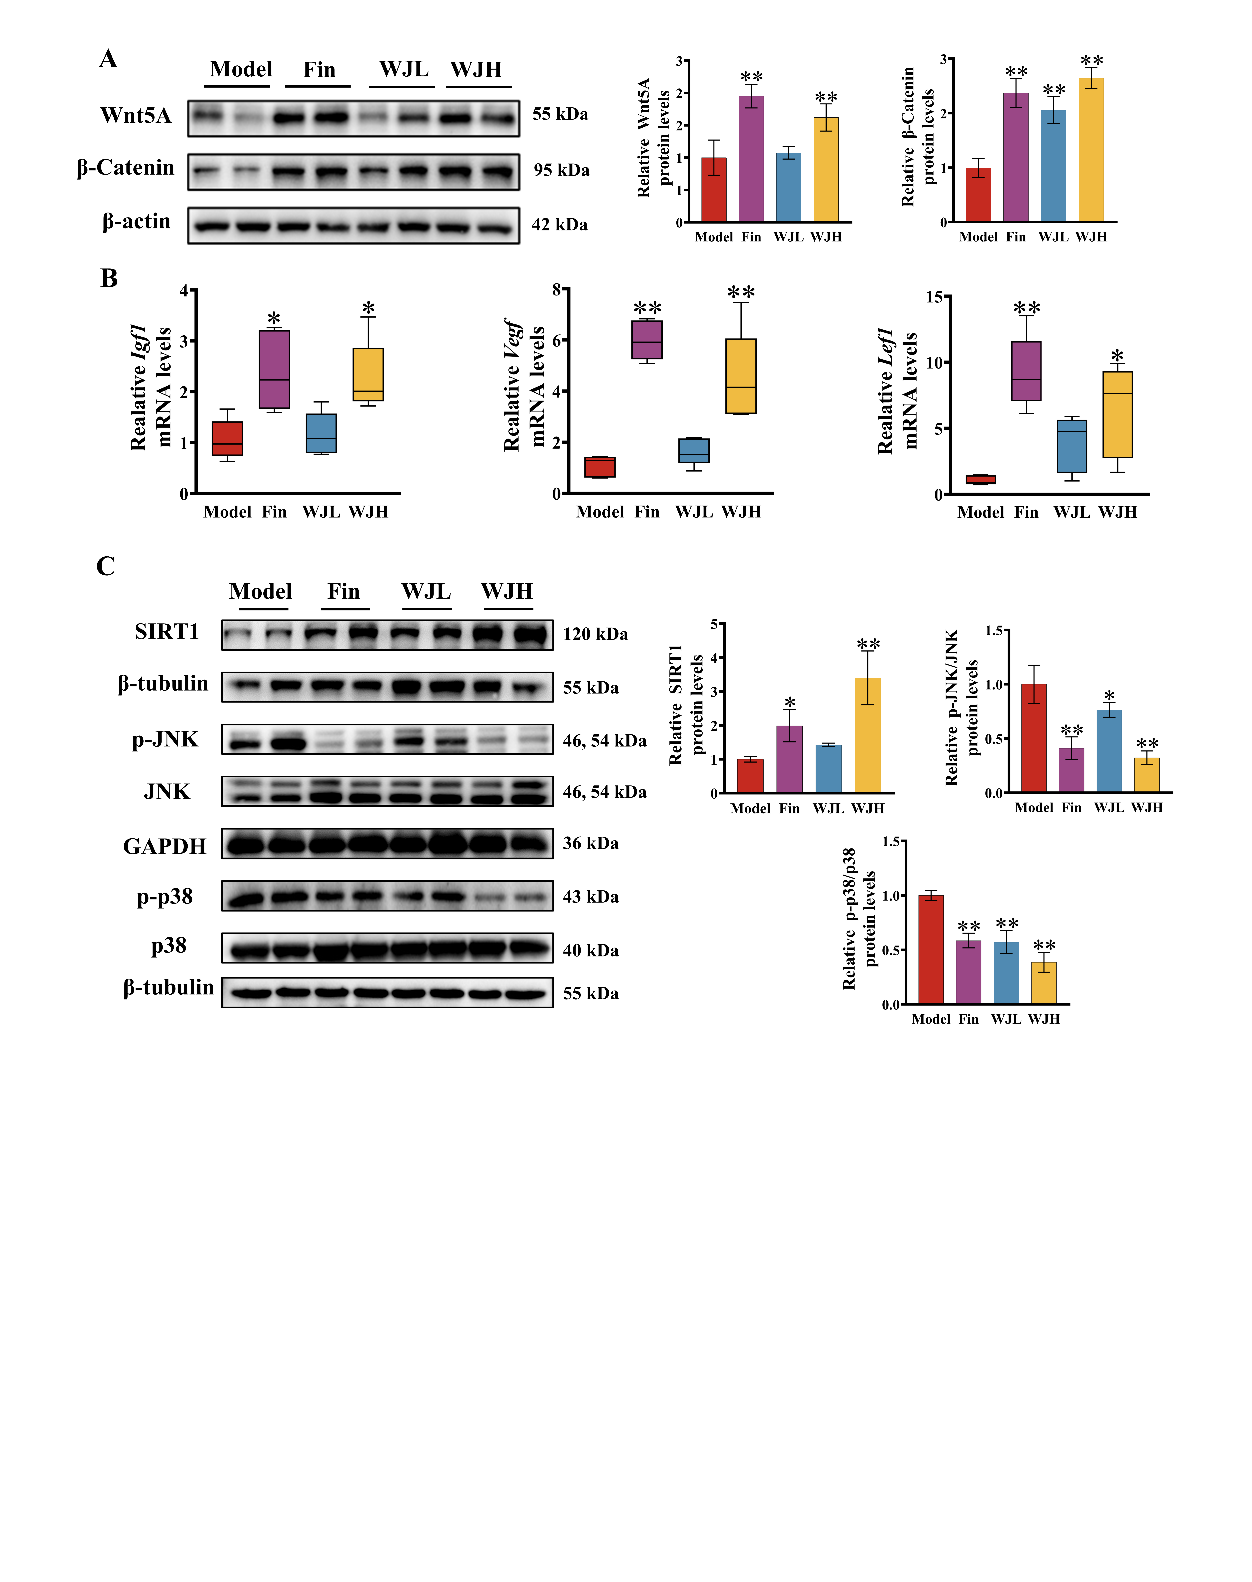
Supplementary Figure S1 The amelioration capability of WJWE on DHT induced AGA model mice has been evaluated.** (A) the expression of β-Catenin, Wnt5A in dorsal skins of mice in different groups (n = 5); (B) The mRNA levels of Igf1, Vegf and Lef1 (n = 5); the expression of SIRT1, p-JNK, JNK, p-p38, p38 in mice dorsal skin (C) samples of different groups (n = 6). Results are presented as means ± SEM. *p < 0.05, **p < 0.01, vs. Model group.

**Supplementary Table 1 The standard content contained in WJWE.**

| Active compounds | Retention time (min) | Quantitative and qualitative ion pairs | Cone hole voltage (V) | Collision energy (eV) |
| --- | --- | --- | --- | --- |
| resveratrol | 3.58 | 277.0/185.0  277.0/143.0 | 26 | 20、26 |
| salidroside | 1.71 | 299.1/88.9  299.1/118.9 | 38 | 14、14 |
| wedelolactone | 3.94 | 313.1/298.0  313.1/185.7 | 44 | 20、34 |
| 2,3,5,4'-tetrahydroxystilbene-2-O-beta-D-glucoside | 2.79 | 405.1/243.1  405.1/173.0 | 38 | 16、36 |
| quercitrin | 3.03 | 447.1/300.4  447.1/271.0 | 56 | 24、42 |
| hydroxysafflor yellow A | 1.87 | 611.3/491.2611.3/325.0 | 64 | 24、30 |
